# Supplementary material for: High-performance freestanding thermoelectric membrane by intact exfoliation of van der Waals epitaxial bismuth antimony telluride film
Source: Research Square preprint supplement (doi:10.21203/rs.3.rs-103826/v1), 2020-11-16
Supplement: Supplementary file 1 [file 8d5f7e82762465f183fd432f.docx]

Supplementary Information

**High-performance freestanding thermoelectric membrane by intact exfoliation of van der Waals epitaxial bismuth antimony telluride film**

Liangwei Fu1,6, Kwansu Park1,6, Kyu Hyoung Lee2,6, Bongju Kim1, Wooseon Choi1, Young-Min Kim1,3, Sang-il Kim4*, Jae-Yeol Hwang5*, Sung Wng Kim1,3*

1 Department of Energy Science, Sungkyunkwan University, Suwon 16419, Republic of Korea.

2 Department of Materials Science and Engineering, Yonsei University, Seoul 03722, Republic of Korea.

3 Center for Integrated Nanostructure Physics, Institute of Basic Science, Suwon 16419, Republic of Korea.

4 Department of Materials Science and Engineering, University of Seoul, Seoul 02504, Republic of Korea.

5 Department of Physics, Pukyong National University, Busan 48513, Republic of Korea.

6 These authors contributed equally: L. Fu, K. Park, K.H. Lee.

*email: [sang1@uos.ac.kr](mailto:sangil.kim@uso.ac.kr), jyhwang@pknu.ac.kr, [kimsungwng@skku.edu](mailto:kimsungwng@skku.edu)


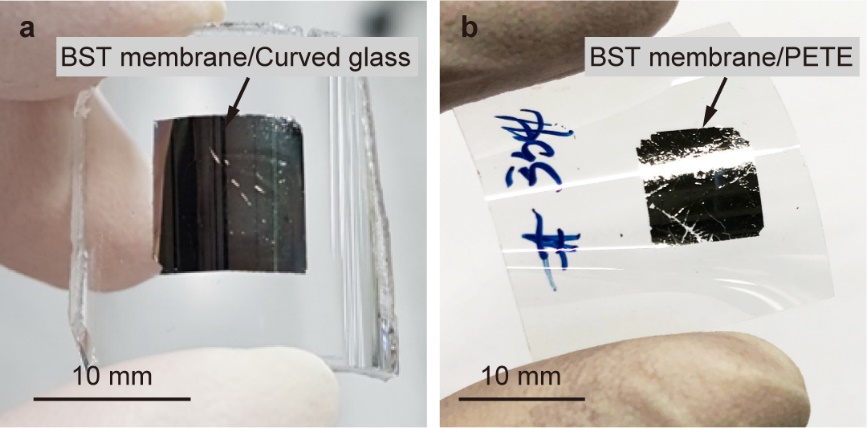


**Supplementary Fig. 1. Photos of freestanding BST membranes. a,b** Photos of BST membranes transferred on curved glass (**a**) and flexible PETE (**b**).


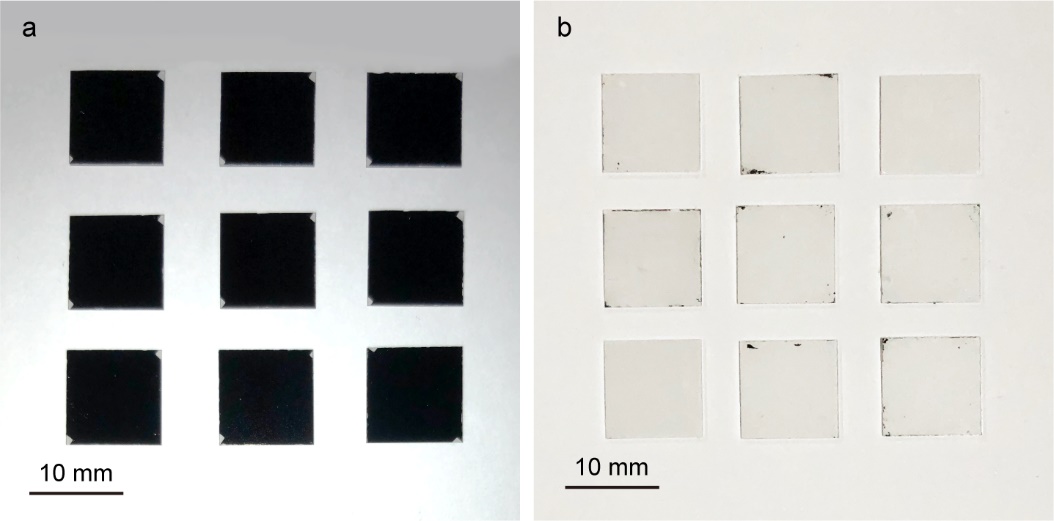


**Supplementary Fig. 2. Photos of before and after exfoliation of vdWE BST films. a** Photos of as-grown vdWE BST films on sapphire substrate. **b** Photos of sapphire substrates after exfoliations of BST films.


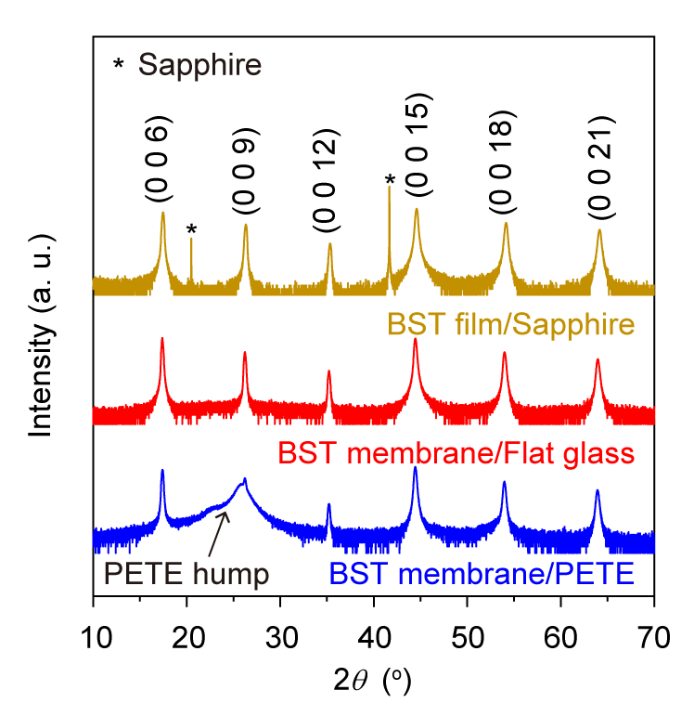


**Supplementary Fig. 3. XRD 2*q* scan of the as-grown vdWE BST film and transferred BST membranes on flat glass and flexible PETE.**


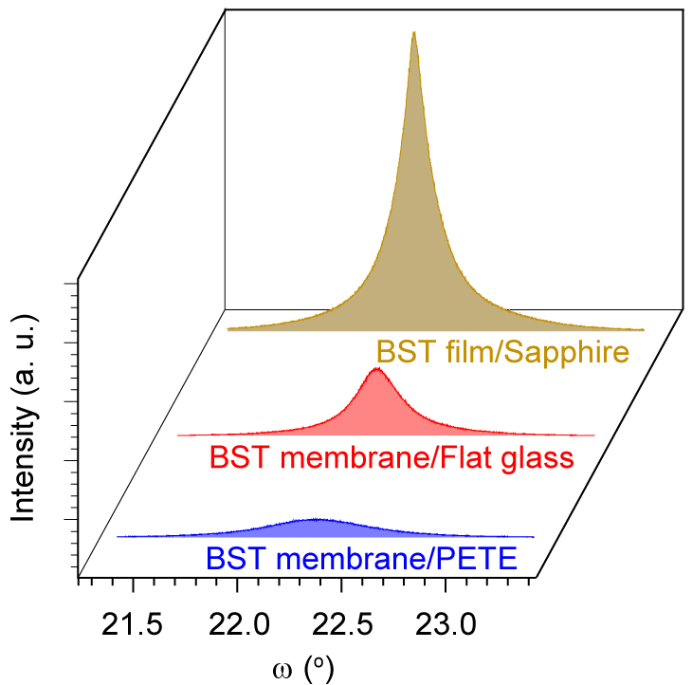


**Supplementary Fig. 4. XRD *w* scan of the as-grown vdWE BST film and transferred BST membranes on flat glass and flexible PETE.**

**Supplementary Note 1. Selective etching of Te monolayer during the exfoliation of vdWE BST film in dilute HF solution.** In order to figure out the etching process during the exfoliation of vdWE BST film, we conducted microstructure and XPS analyses. Cross section image in Supplementary Fig. 5a clearly shows the formation of Te monolayer between as-grown BST film and sapphire substrate, which is critical for the vdWE growth of BST film. After exfoliation of BST film and transferring on SiO2/Si wafer, the Te monolayer is unobservable (Supplementary Fig. 5b). We conducted XPS analysis on the sapphire substrate after exfoliation of BST film (Supplementary Fig. 6). XPS is capable of detecting signal near the sample surface but there is no Te signal from the sapphire substate after exfoliation of BST film. These two results indicate that the Te monolayer, as a sacrificial layer, is selectively etched by a dilute HF solution during peel-off process.


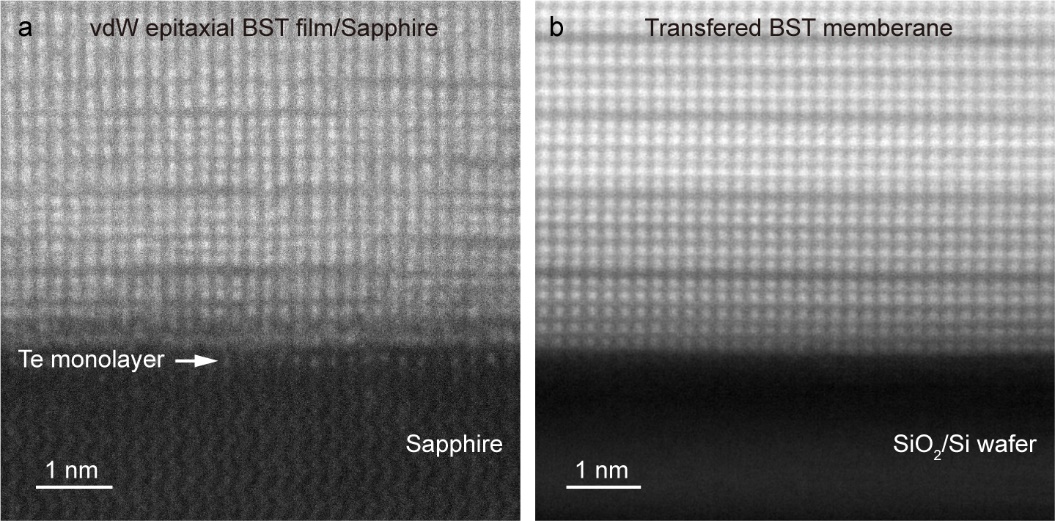


**Supplementary Fig. 5. STEM cross section images. a** Cross section of as-grown vdWE BST film on sapphire. **b** Cross section of exfoliated BST membrane, which is transferred on SiO2/Si wafer for characterization.


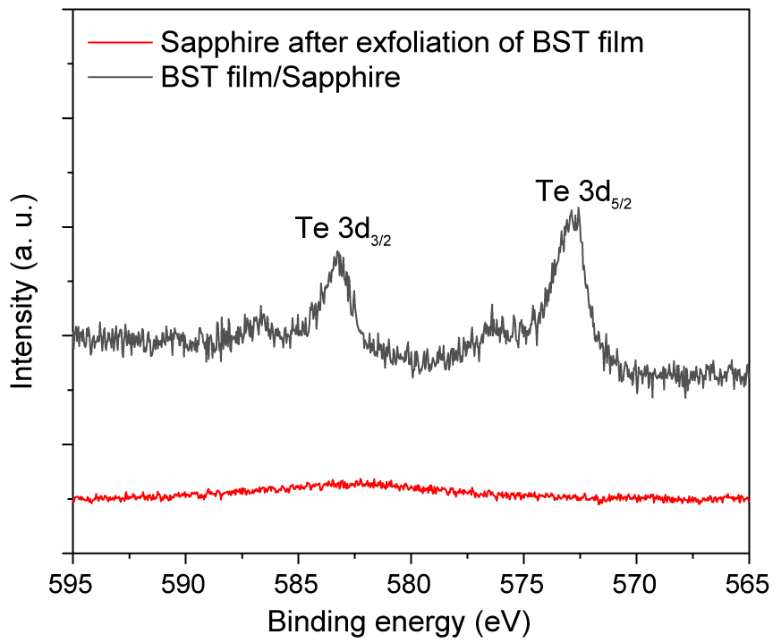


**Supplementary Fig. 6. X-ray photoemission spectroscopy (XPS) analysis**. XPS spectra of as-grown BST film on sapphire and sapphire substrate after exfoliation of BST film.

**Supplementary Note 2. Lattice thermal conductivity calculation.** The in-plane lattice thermal conductivity (*k*L,in) for as-grown film and transferred membranes on flat and curved glass substrates were calculated by subtracting the electronic part (*k*e,in) from total *κ*in. The electronic thermal conductivity can be calculated by the Wiedemann-Frantz law, *k*e,in = *LsT*, where the *L* is the Lorentz number. As the band gap (*E*g) of Bi0.5Sb1.5Te3 is very small (~0.19 eV)1, the Lorentz number is obtained by a Kane band model2:

(S1)

(S2)

where *S*, , *k*B, *e* and *x* (=*E*f/*k*B*T*) are the Seebeck coefficient, Fermi integral, Boltzmann constant, the elementary charge, and reduced Fermi energy. is expressed as follows2:

(S3)

(S4)

In the Equation S2, *x*, *f*, and *a* (= *k*B*T*/*E*g) are reduced energy of the electron state, the Fermi distribution, and reciprocal reduced band gap. First the value of *x* is obtained by experimental *S* at 300 K via Equation S1. Then, the Lorentz number for each thin-film material can be calculated via Equation S2 and *x*. Finally, we can calculate the *k*L,in values. The calculated *k*L,in values for as-grown BST film and transferred membranes are shown in Supplementary Fig. 7 along with reported values3,4.


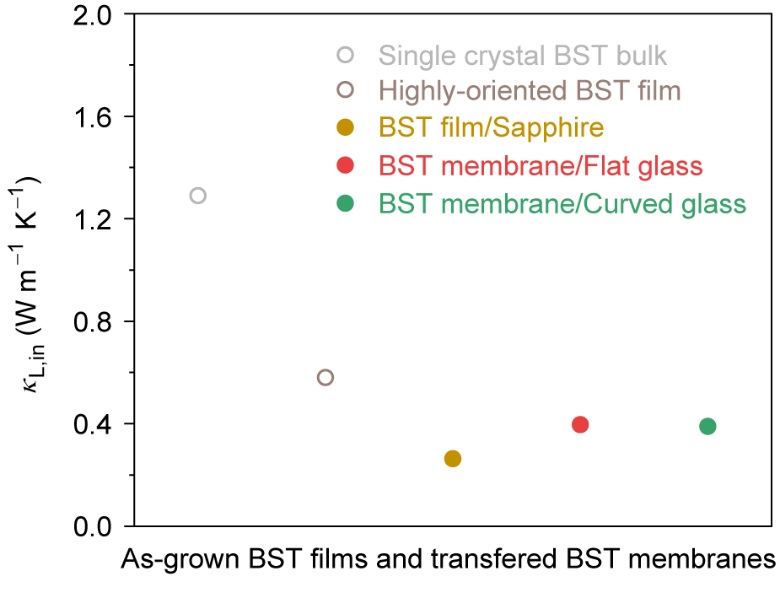


**Supplementary Fig. 7**. **Lattice thermal conductivity.** The in-plane lattice thermal conductivity (*k*L,in) of vdWE BST films and freestanding BST membranes on flat and curved glasses. Reported *k*L,in values of single crystal Bi0.5Sb1.5Te3 bulk3 and highly-oriented nanocrystalline Bi0.5Sb1.5Te3 film4 are also shown for comparison.

**Supplementary Note 3. Efficiency of energy conversion.** The energy conversion efficiency (*h*) is determined by the dimensionless figure of merit, *zT*, which is defined as5:

(S5)

where *T*h and *T*c are the hot-side and code-side temperature, respectively, and the is the average *zT* value. In this work, we suppose that the *zT* value hardly changes in the temperature range of 300–350 K, resulting in the average *zT* value of ~0.9 for freestanding BST membranes. So, the corresponding *h* for freestanding BST membranes is 4.6% when the cold- and hot-side temperature is 300 K and 350 K, respectively.


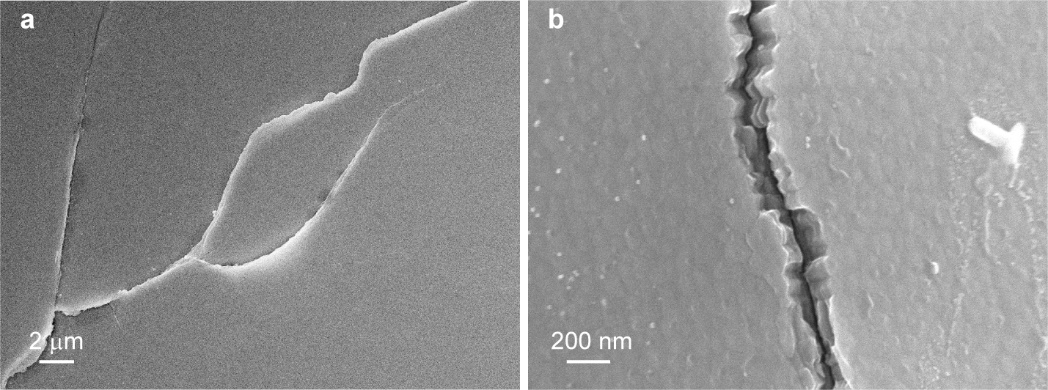


**Supplementary Fig. S8. Morphology of freestanding BST membrane on PETE after bending test. a,b** SEM images of the cracks in BST membrane on PETE after bending test.

**References**

1. Witting, I. T.*, et al.* The Thermoelectric Properties of Bismuth Telluride. *Adv. Electron. Mater.* **5**, 1800904 (2019).

2. Pei, Y., Wang, H., Gibbs, Z. M., LaLonde, A. D. & Snyder, G. J. Thermopower enhancement in Pb1−xMnxTe alloys and its effect on thermoelectric efficiency. *NPG Asia Mater* **4**, e28 (2012).

3. Caillat, T., Carle, M., Pierrat, P., Scherrer, H. & Scherrer, S. Thermoelectric properties of (BixSb1−x)2Te3 single crystal solid solutions grown by the T.H.M. method. *J. Phys. Chem. Solids* **53**, 1121–1129 (1992).

4. Takashiri, M., Tanaka, S. & Miyazaki, K. Improved thermoelectric performance of highly-oriented nanocrystalline bismuth antimony telluride thin films. *Thin Solid Films* **519**, 619–624 (2010).

5. Snyder, G. J. & Toberer, E. S. Complex thermoelectric materials. *Nat. Mater.* **7**, 105–114 (2008).
